# Supplementary material for: GDSL Lipase Gene HTA1 Negatively Regulates Heat Tolerance in Rice Seedlings by Regulating Reactive Oxygen Species Accumulation
Source: MDPI journal article supplement (doi:10.3390/antiox13050592), 2024-05-11
Supplement: s1 [file s1]

Table S1 Primer name and sequence

| Primer name                  | Sequence (5'-3')          | Gene symbol |
|------------------------------|---------------------------|-------------|
| <i>qPHTA1-F</i>              | TGATCTAGGAGCCAAGACGAT     | LOC4332910  |
| <i>qPHTA1-R</i>              | CACCGAGAAGTCATTCAACCA     |             |
| <i>OsActin1-F</i>            | GACCTTCAACACCCCTGCTA      | LOC4333919  |
| <i>OsActin1-R</i>            | GAGTCCAACACAATACCTGTGG    |             |
| <i>OsCTAB-F</i>              | CCCTCCATGTGCCTGTAGTT      | LOC4342124  |
| <i>OsCTAB-R</i>              | GTTTCGGTTCTCCACAGTCGT     |             |
| <i>Fe<sup>2+</sup>-SOD-F</i> | GCCAGACCCCAAAAGTGATA      | LOC4340091  |
| <i>Fe<sup>2+</sup>-SOD-R</i> | CTTGATGCCCTGGAACCTTA      |             |
| <i>OsAXP1-F</i>              | CAGTTCGGAGAGCTTGAGGT      | LOC4332474  |
| <i>OsAXP1-R</i>              | CCAAGGGTTCTGACCACCTA      |             |
| <i>OsSNAC1-F</i>             | CACACGTTGCAGCATCGATC      | LOC4334553  |
| <i>OsSNAC1-R</i>             | CATGGTCCCCTTCTGAGGTG      |             |
| <i>OsDREB2A-F</i>            | TTCCGCTCCTGACAAACACG      | LOC4324418  |
| <i>OsDREB2A-R</i>            | GGAATCTCCTCCTTTCATCGTG    |             |
| <i>OsLEA-F</i>               | CACACCCGTCAGAAATCCTC      | LOC543476   |
| <i>OsLEA-R</i>               | TCACTTCAAATTTCGGTGCAA     |             |
| <i>OsHSP90-F</i>             | GCCAAGCGTCAAGCAGTGACCAA   | LOC4342077  |
| <i>OsHSP90-R</i>             | GGTCATCAAAGCGCCGCCCTAT    |             |
| <i>OsHSP70-F</i>             | TTTGGGCGAAGGTGACACTGCTA   | LOC4351208  |
| <i>OsHSP70-R</i>             | TGGCAATGGTCCCAAGGTTCTTAAT |             |
| <i>OsTT2-F</i>               | AAACAGAGGAGCTTGGACCG      | LOC9269602  |
| <i>OsTT2-R</i>               | ATGTTTCCGCGCTTTATGCC      |             |
| <i>OsHSFA1a-F</i>            | AAATGATGTCGTTTCCTGGC      | LOC4334826  |
| <i>OsHSFA1a-R</i>            | ATCCTTCGTTTCTTGCTGC       |             |
| <i>OsHSFA2a-F</i>            | TAGTGAAAGTGAAGGTCGAAGA    | LOC4334080  |
| <i>OsHSFA2a-R</i>            | ATGAGAGTCCCAAACAATAAAG    |             |
